# Supplementary material
Source: PubMed Central journal article supplement (PMC1348005)

Urinary nitrate+nitrite  $\square$   
( $\mu\text{mol}/\text{mmol}$  creatinine)

Urinary epicatechin  
equivalents (nM)  $\blacksquare$

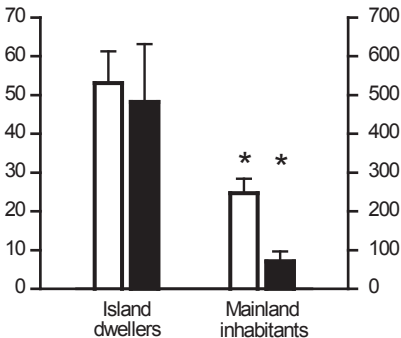

Supplement: pnas_0510168103_1.pdf [file pnas_0510168103_1.pdf]
