# Supplementary material
Source: PubMed Central journal article supplement (PMC1348005)
Supplement: pnas_0510168103_5.pdf [file pnas_0510168103_5.pdf]

**Table 1. <sup>1</sup>H-NMR chemical shifts of epicatechin metabolites**

| Compound   | EC                  | 3'MEC               | 4'MEC               | EC7Gluc             | 3'MEC5/7Gluc        | 4'MEC7Gluc          |
|------------|---------------------|---------------------|---------------------|---------------------|---------------------|---------------------|
| 2          | 4.86 s              | 4.26 s              | 4.29 s              | 4.84 s              | 4.92 s              | 4.93 s              |
| 3          | 4.25 m              | 4.19 m              | 4.20 m              | 4.24 m              | 4.21 m              | 4.22 m              |
| 4a         | 2.74 dd (2.4, 16.8) | 2.75 dd (2.3, 17.0) | 2.74 dd (2.2, 16.9) | 2.75 dd (2.6, 17.1) | 2.83 dd (2.6, 17.0) | 2.85 dd (2.3, 17.2) |
| 4b         | 2.86 dd (4.5, 17.2) | 2.87 dd (4.3, 16.7) | 2.86 dd (4.4, 17.0) | 2.89 dd (4.3, 16.8) | 2.85 dd (4.5, 16.9) | 2.83 dd (4.3, 16.8) |
| 6          | 5.98 d (2.3)        | 6.03 d (1.8)        | 5.97 d (2.5)        | 6.26 d (2.2)        | 6.29 d (2.3)        | 6.27 d (2.1)        |
| 8          | 5.95 d (2.2)        | 5.99 d (2.2)        | 5.93 d (2.3)        | 6.21 d (2.1)        | 6.15 d (2.0)        | 6.21 d (1.9)        |
| 2'         | 6.99 s              | 7.12 d (1.5)        | 7.24 s              | 7.03 s              | 7.21 s              | 7.19 s              |
| 5'         | 6.92 d (8.2)        | 6.76 d (8.0)        | 6.72 d (8.3)        | 6.77 d (8.2)        | 6.98 d (8.4)        | 7.01 d (8.2)        |
| 6'         | 6.91 dd (2.1, 8.1)  | 6.90 dd (2.2, 8.2)  | 6.84 dd (2.1, 8.3)  | 6.73 dd (1.9, 8.2)  | 6.99 s              | 6.97 s              |
| -OCH3      |                     | 3.84 s              | 3.86 s              |                     | 3.84 s              | 3.85 s              |
| 1"         |                     |                     |                     | 4.91 d (7.9)        | 4.94 d (7.3)        | 5.01 d (7.2)        |
| 2", 3", 4" |                     |                     |                     | 3.49~3.51 m         | 3.50~3.55 m         | 3.52~3.55 m         |
| 5"         |                     |                     |                     | 3.92 d (8.6)        | 3.77 d (8.4)        | 3.74 d (8.2)        |
| 6"         |                     |                     |                     |                     |                     |                     |
