# Supplementary material
Source: PubMed Central journal article supplement (PMC1348005)
Supplement: pnas_0510168103_6.pdf [file pnas_0510168103_6.pdf]

**Table 2. <sup>13</sup>C-NMR chemical shifts of epicatechin metabolites**

| Compound | EC    | 3'MEC | 4'MEC | EC7Gluc | 3'MEC5/7Gluc | 4'MEC7Gluc |
|----------|-------|-------|-------|---------|--------------|------------|
| 2        | 79.8  | 79.9  | 79.7  | 79.7    | 80.1         | 79.4       |
| 3        | 67.4  | 67.5  | 67.4  | 66.9    | 66.5         | 66.8       |
| 4        | 29.2  | 29.4  | 29.3  | 29.4    | 29           | 29.1       |
| 5        | 157.9 | 157.5 | 157.6 | 157.3   | 157.4        | 157.1      |
| 6        | 96.4  | 96.5  | 95.6  | 97.4    | 97.3         | 97.6       |
| 7        | 157.9 | 157.6 | 157.5 | 158.2   | 158.1        | 158.5      |
| 8        | 95.8  | 96    | 95.9  | 97.2    | 96.7         | 97.1       |
| 9        | 157.3 | 157.3 | 157.2 | 157.5   | 157.6        | 157.5      |
| 10       | 100.1 | 100.2 | 100.1 | 102.6   | 101.8        | 102.4      |
| 1'       | 132.2 | 132.3 | 133.5 | 133.1   | 132.7        | 133        |
| 2'       | 115.3 | 111.9 | 112.4 | 115.7   | 115.5        | 115.7      |
| 3'       | 145.9 | 148.6 | 146.7 | 146.1   | 147.9        | 145.4      |
| 4'       | 145.7 | 146.8 | 148.5 | 146.3   | 146.1        | 148.1      |
| 5'       | 115.9 | 115.7 | 115.1 | 115.5   | 115.7        | 115.9      |
| 6'       | 119.7 | 120.6 | 119.3 | 121.7   | 122.4        | 121.3      |
| -OCH3    |       | 56.4  | 56.5  |         | 56.5         | 56.7       |
| 1''      |       |       |       | 101.2   | 101.8        | 100.9      |
| 2''      |       |       |       | 75      | 75.2         | 74.8       |
| 3''      |       |       |       | 77.3    | 77.5         | 77.5       |
| 4''      |       |       |       | 74.1    | 74           | 73.8       |
| 5''      |       |       |       | 77.4    | 77.3         | 77.1       |
| 6''      |       |       |       | 177.6   | 182.4        | 180.4      |
