# Supplementary material
Source: PubMed Central journal article supplement (PMC1348005)

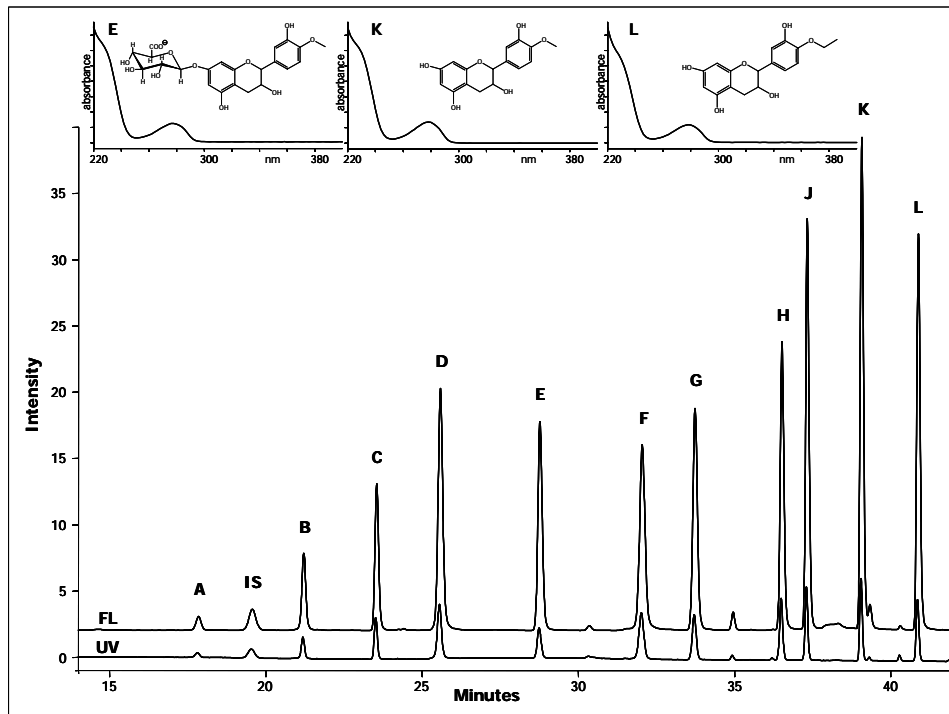

Supplement: pnas_0510168103_2.pdf [file pnas_0510168103_2.pdf]

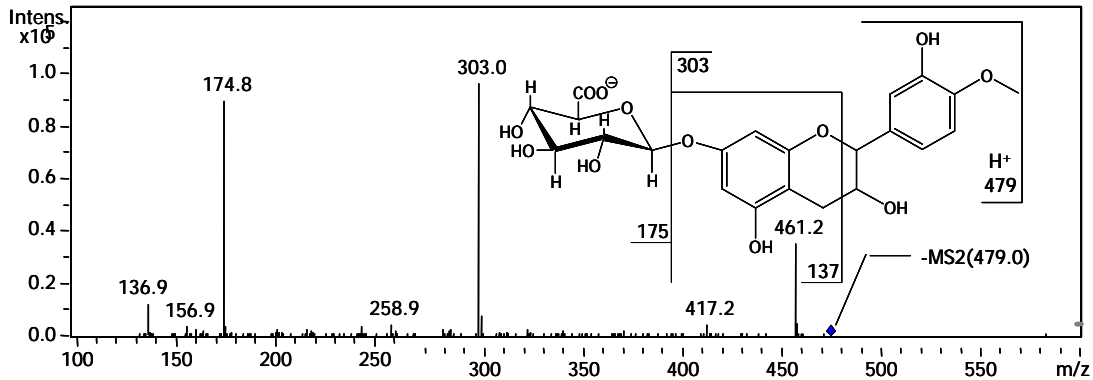

Supplement: pnas_0510168103_3.pdf [file pnas_0510168103_3.pdf]

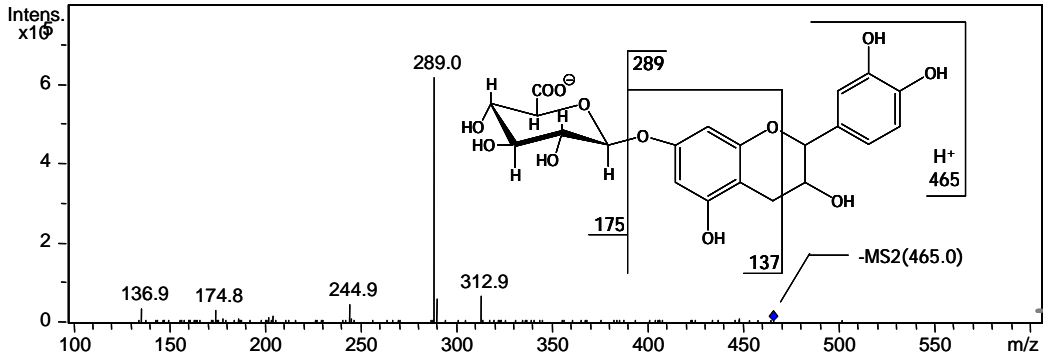

Supplement: pnas_0510168103_4.pdf [file pnas_0510168103_4.pdf]
